# Supplementary material for: IR-polarizing film containing a new quinoline dye and Fe3O4 nanoparticles: optical and thermophysical investigations
Source: Royal Society of Chemistry journal article supplement (doi:10.1039/c6ra23531j), 2016-01-01
Supplement: c6ra23531j1.pdf [file c6ra23531j1.pdf]

### Supplementary data

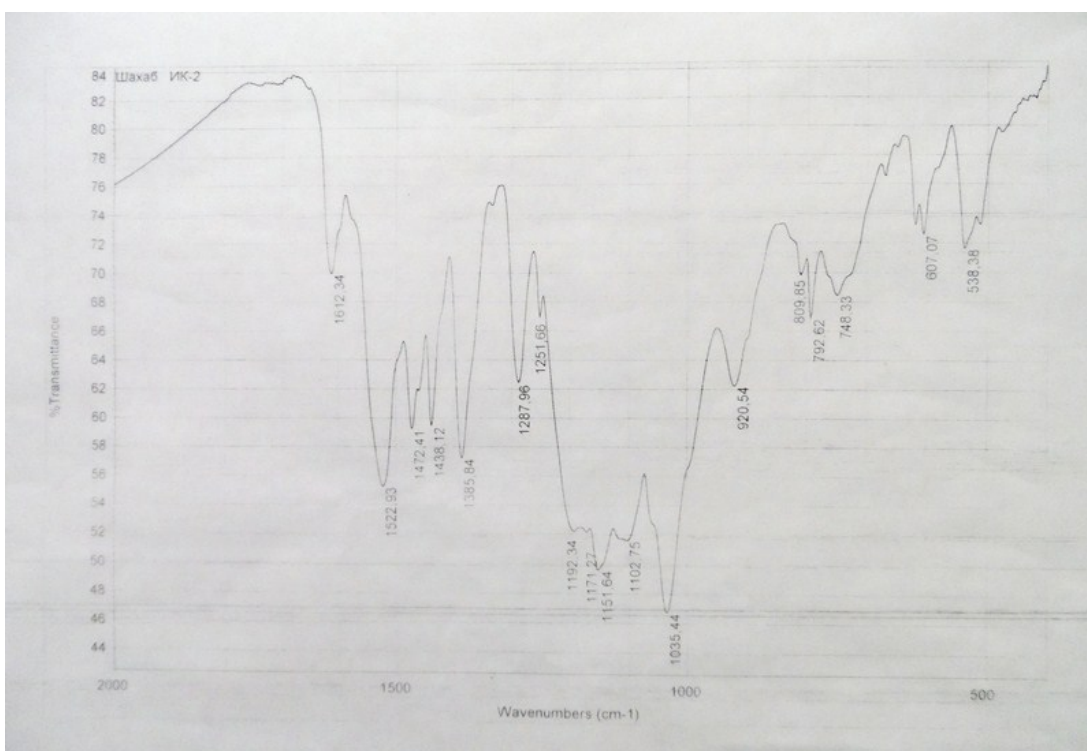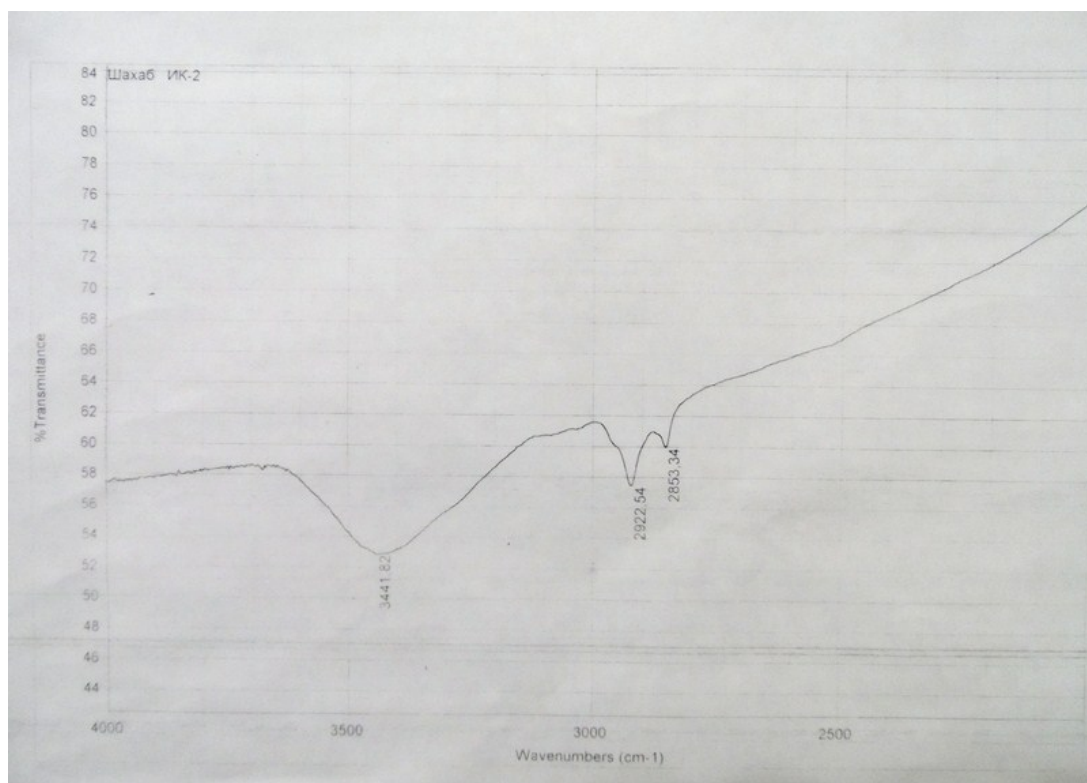

**Fig. S1** Experimental FT-IR spectrum of the dye **M**

**Table S2** Electronic absorption spectrum of the compound **M** calculated by TDB3LYP/6-311++G\* method

| Excited state        | Wavelength (nm) | Excitation energy (eV) | Configurations composition (corresponding transition orbitals)                                                                                        | Oscillator strength (f) |
|----------------------|-----------------|------------------------|-------------------------------------------------------------------------------------------------------------------------------------------------------|-------------------------|
| S <sub>1</sub>       | 2869            | 0.43                   | 1.02(198→199) - 0.22(199→198)                                                                                                                         | 0.14                    |
| S <sub>2</sub>       | 1223            | 1.01                   | - 0.10(198→200) + 0.98060(197→199)                                                                                                                    | 0.02                    |
| <b>S<sub>3</sub></b> | <b>764</b>      | <b>1.63</b>            | <b>0.38(198→200) + 0.23(199→200) + 0.78(195→199)</b><br><b>+ 0.26(196→199) + 0.26(198→200)</b>                                                        | <b>2.04</b>             |
| S <sub>4</sub>       | 690             | 1.80                   | - 0.11(198→200) - 0.21(195→199) + 0.96(196→199)                                                                                                       | 0.00                    |
| S <sub>5</sub>       | 601             | 2.07                   | 0.33(198→200) + 0.30(199→200) - 0.48(195→199)<br>+ 0.73(198→200)                                                                                      | 0.31                    |
| S <sub>6</sub>       | 596             | 2.08                   | - 0.51(193→199) + 0.86(194→199)                                                                                                                       | 0.00                    |
| S <sub>7</sub>       | 567             | 2.19                   | - 0.26(191→199) - 0.12(192→199) + 0.81(193→199)<br>+ 0.49(194→199)                                                                                    | 0.00                    |
| S <sub>8</sub>       | 563             | 2.20                   | 0.28(199→200) + 0.78(191→199) + 0.37(192→199)<br>+ 0.27(193→199) + 0.15(194→199) - 0.21(198→200)                                                      | 0.06                    |
| S <sub>9</sub>       | 549             | 2.26                   | - 0.20(197→200) + 0.76(199→200) - 0.22(191→199)<br>- 0.37(192→199) + 0.15(197→200) - 0.38(198→200)                                                    | 0.15                    |
| S <sub>10</sub>      | 536             | 2.32                   | - 0.14(197→200) - 0.17(198→200) + 0.24(199→200)<br>- 0.44(191→199) + 0.80(192→199) + 0.13(195→199)<br>+ 0.11(197→200)                                 | 0.00                    |
| S <sub>11</sub>      | 498             | 2.49                   | - 0.34(197→200) + 0.72(198→200) - 0.31(199→200)<br>- 0.11(188→199) - 0.13(191→199) + 0.12(192→199)<br>+ 0.10(197→199) + 0.25(197→200) - 0.33(198→200) | 0.36                    |
| S <sub>12</sub>      | 494             | 2.51                   | 0.59(197→200) + 0.29(198→200) + 0.15(199→200)<br>- 0.20(188→199) - 0.17(191→199) + 0.18(192→199)<br>- 0.20(195→199) - 0.51(197→200) - 0.26(198→200)   | 0.23                    |
| S <sub>13</sub>      | 462             | 2.68                   | - 0.16(193→200) + 0.10(197→200) + 0.23(198→200)<br>- 0.11(183→199) + 0.12(185→199) + 0.25(187→199)<br>+ 0.78(188→199) - 0.34(189→199) - 0.14(198→200) | 0.19                    |
| S <sub>14</sub>      | 440             | 2.82                   | 0.13(183→199) + 0.36(188→199) + 0.88(189→199)<br>- 0.27(190→199)                                                                                      | 0.00                    |
| S <sub>15</sub>      | 432             | 2.87                   | 0.28(183→199) - 0.26(185→199) - 0.25(187→199)<br>0.26(188→199) + 0.83(190→199)                                                                        | 0.00                    |
| S <sub>16</sub>      | 426             | 2.91                   | - 0.11(199→206) + 0.49(183→199) + 0.28(184→199)<br>- 0.39(185→199) - 0.37(187→199) + 0.15(188→199)<br>- 0.30(189→199) - 0.48(190→199)                 | 0.01                    |
| S <sub>17</sub>      | 413             | 3.00                   | 0.22(193→200) + 0.62(197→200) + 0.11(182→199)<br>- 0.13(195→200) + 0.71(197→200)                                                                      | 0.05                    |
| S <sub>18</sub>      | 409             | 3.03                   | 0.45(183→199) - 0.35(184→199) + 0.38(185→199)<br>+ 0.69(186→199) - 0.22(187→199)                                                                      | 0.00                    |
| S <sub>19</sub>      | 406             | 3.05                   | 0.15(183→199) + 0.20(184→199) - 0.50(185→199)<br>+ 0.49(186→199) + 0.66(187→199)                                                                      | 0.00                    |
| S <sub>20</sub>      | 405             | 3.06                   | 0.61(183→199) + 0.34(185→199) - 0.48(186→199)<br>+ 0.48(187→199) - 0.14(188→199)                                                                      | 0.00                    |

**Table S3** Occupancy of NBOs and hybrids of the dye **M** calculated by B3LYP/6-311<sup>++</sup>G\* method for C, N, S, Cl atoms

| Donor Lewis – type NBOs   | Occupancy | Hybrid             | AO (%)              |
|---------------------------|-----------|--------------------|---------------------|
| $\sigma(1)$ C(13) – N(14) | 0.99001   | sp <sup>3.43</sup> | s(22.56%) p(77.32%) |
| $\sigma(1)$ C(13) – N(14) | 0.99001   | sp <sup>2.12</sup> | s(32.04%) p(67.94%) |
| $\sigma(1)$ C(15) – N(14) | 0.99180   | sp <sup>1.84</sup> | s(35.21%) p(64.75%) |
| $\sigma(1)$ C(15) – N(14) | 0.99180   | sp <sup>2.53</sup> | s(28.30%) p(71.61%) |
| $\sigma(1)$ C(38) – N(14) | 0.99186   | sp <sup>2.14</sup> | s(31.85%) p(68.13%) |
| $\sigma(1)$ C(38) – N(14) | 0.99186   | sp <sup>3.28</sup> | s(23.32%) p(76.56%) |
| $\sigma(1)$ N(25) – C(24) | 0.99201   | sp <sup>2.42</sup> | s(29.20%) p(70.70%) |
| $\sigma(1)$ N(25) – C(24) | 0.99201   | sp <sup>1.72</sup> | s(36.76%) p(63.19%) |
| $\sigma(1)$ N(25) – C(26) | 0.99058   | sp <sup>2.05</sup> | s(32.75%) p(67.22%) |
| $\sigma(1)$ N(25) – C(26) | 0.99058   | sp <sup>2.85</sup> | s(25.98%) p(73.92%) |
| $\sigma(1)$ N(25) – C(34) | 0.99073   | sp <sup>2.28</sup> | s(30.45%) p(69.53%) |
| $\sigma(1)$ N(25) – C(34) | 0.99073   | sp <sup>3.57</sup> | s(21.85%) p(78.02%) |
| $\sigma(1)$ C(8) – Cl(83) | 0.99410   | sp <sup>3.22</sup> | s(23.68%) p(76.15%) |
| $\sigma(1)$ C(8) – Cl(83) | 0.99410   | sp <sup>4.20</sup> | s(19.15%) p(80.34%) |
| $\sigma(1)$ C(41) – S(88) | 0.98457   | sp <sup>4.23</sup> | s(19.09%) p(80.80%) |
| $\sigma(1)$ C(41) – S(88) | 0.98457   | sp <sup>3.05</sup> | s(24.32%) p(74.18%) |
| $\sigma(1)$ O(85) – S(84) | 0.99398   | sp <sup>2.94</sup> | s(24.94%) p(73.22%) |
| $\sigma(1)$ O(85) – S(84) | 0.99398   | sp <sup>3.41</sup> | s(22.66%) p(77.22%) |
| $\sigma(1)$ O(86) – S(84) | 0.99415   | sp <sup>2.80</sup> | s(25.88%) p(72.37%) |
| $\sigma(1)$ O(86) – S(84) | 0.99415   | sp <sup>3.19</sup> | s(23.84%) p(76.03%) |
| $\sigma(1)$ O(87) – S(84) | 0.99392   | sp <sup>2.90</sup> | s(25.16%) p(73.00%) |
| $\sigma(1)$ O(87) – S(84) | 0.99392   | sp <sup>3.39</sup> | s(22.74%) p(77.14%) |
| $\sigma(1)$ O(89) – S(88) | 0.99414   | sp <sup>2.77</sup> | s(26.06%) p(72.21%) |
| $\sigma(1)$ O(89) – S(88) | 0.99414   | sp <sup>3.17</sup> | s(23.95%) p(75.92%) |
| $\sigma(1)$ O(90) – S(88) | 0.99414   | sp <sup>2.94</sup> | s(24.94%) p(73.22%) |
| $\sigma(1)$ O(90) – S(88) | 0.99414   | sp <sup>3.41</sup> | s(22.67%) p(77.20%) |
| $\sigma(1)$ O(91) – S(88) | 0.99384   | sp <sup>2.94</sup> | s(24.90%) p(73.27%) |
| $\sigma(1)$ O(91) – S(88) | 0.99384   | sp <sup>3.42</sup> | s(22.60%) p(77.27%) |
| LP (1) N(14)              | 0.88297   | p <sup>1.00</sup>  | s(0.88%) p(99.12%)  |
| LP (1) N(25)              | 0.80234   | p <sup>1.00</sup>  | s( 0.01%) p(99.98%) |
| LP (1) Cl(83)             | 0.99510   | sp <sup>0.24</sup> | s(80.79%) p(19.19%) |
| LP (2) Cl(83)             | 0.97891   | p <sup>1.00</sup>  | s(0.07%) p(99.91%)  |
| LP (3) Cl(83)             | 0.95551   | p <sup>1.00</sup>  | s(0.02%) p(99.95%)  |
| LP (1) O(85)              | 0.98215   | sp <sup>0.30</sup> | s(77.06%) p(22.94%) |
| LP (2) O(85)              | 0.92837   | p <sup>1.00</sup>  | s(0.34%) p(99.60%)  |
| LP (3) O(85)              | 0.92501   | p <sup>1.00</sup>  | s(0.00%) p(99.94%)  |
| LP (1) O(86)              | 0.99164   | sp <sup>0.31</sup> | s(76.20%) p(23.80%) |
| LP (2) O(86)              | 0.91933   | p <sup>1.00</sup>  | s(0.00%) p(99.93%)  |
| LP (3) O(86)              | 0.91578   | p <sup>1.00</sup>  | s(0.00%) p(99.93%)  |
| LP (1) O(87)              | 0.98175   | sp <sup>0.30</sup> | s(76.99%) p(23.00%) |
| LP (2) O(87)              | 0.92803   | p <sup>1.00</sup>  | s(0.32%) p(99.62%)  |
| LP (3) O(87)              | 0.92362   | p <sup>1.00</sup>  | s(0.00%) p(99.94%)  |
| LP (1) O(89)              | 0.99169   | sp <sup>0.31</sup> | s(76.08%) p(23.91%) |
| LP (2) O(89)              | 0.91839   | p <sup>1.00</sup>  | s(0.01%) p(99.93%)  |
| LP (3) O(89)              | 0.91556   | p <sup>1.00</sup>  | s(0.00%) p(99.93%)  |
| LP (1) O(90)              | 0.98190   | sp <sup>0.30</sup> | s(77.12%) p(22.88%) |
| LP (2) O(90)              | 0.93023   | p <sup>1.00</sup>  | s(0.26%) p(99.68%)  |
| LP (3) O(90)              | 0.92324   | p <sup>1.00</sup>  | s(0.01%) p(99.93%)  |
| LP (1) O(91)              | 0.98175   | sp <sup>0.30</sup> | s(77.09%) p(22.91%) |

|                        |         |             |                     |
|------------------------|---------|-------------|---------------------|
| LP (2) O(91)           | 0.92997 | $p^{1.00}$  | s(0.35%) p(99.59%)  |
| LP (3) O(91)           | 0.92455 | $p^{1.00}$  | s(0.01%) p(99.93%)  |
| $\pi(2)$ C(13) – N(14) | 0.02063 | $sp^{3.43}$ | s(22.56%) p(77.32%) |
| $\pi(2)$ C(13) – N(14) | 0.02063 | $sp^{2.12}$ | s(32.04%) p(67.94%) |
| $\pi(2)$ C(15) – N(14) | 0.01709 | $sp^{1.84}$ | s(35.21%) p(64.75%) |
| $\pi(2)$ C(15) – N(14) | 0.01709 | $sp^{2.53}$ | s(28.30%) p(71.61%) |
| $\pi(2)$ C(38) – N(14) | 0.01325 | $sp^{2.14}$ | s(31.85%) p(68.13%) |
| $\pi(2)$ C(38) – N(14) | 0.01325 | $sp^{3.28}$ | s(23.32%) p(76.56%) |
| $\pi(2)$ N(25) – C(24) | 0.01595 | $sp^{2.42}$ | s(29.20%) p(70.70%) |
| $\pi(2)$ N(25) – C(24) | 0.01595 | $sp^{1.72}$ | s(36.76%) p(63.19%) |
| $\pi(2)$ N(25) – C(26) | 0.02075 | $sp^{2.05}$ | s(32.75%) p(67.22%) |
| $\pi(2)$ N(25) – C(26) | 0.02075 | $sp^{2.85}$ | s(25.98%) p(73.92%) |
| $\pi(2)$ N(25) – C(34) | 0.01556 | $sp^{2.28}$ | s(30.45%) p(69.53%) |
| $\pi(2)$ N(25) – C(34) | 0.01556 | $sp^{3.57}$ | s(21.85%) p(78.02%) |
| $\pi(2)$ C(8) – Cl(83) | 0.01766 | $sp^{3.22}$ | s(23.68%) p(76.15%) |
| $\pi(2)$ C(8) – Cl(83) | 0.01766 | $sp^{4.20}$ | s(19.15%) p(80.34%) |
| $\pi(2)$ C(41) – S(88) | 0.09765 | $sp^{4.23}$ | s(19.09%) p(80.80%) |
| $\pi(2)$ C(41) – S(88) | 0.09765 | $sp^{3.05}$ | s(24.32%) p(74.18%) |
| $\pi(2)$ O(85) – S(84) | 0.08787 | $sp^{2.94}$ | s(24.94%) p(73.22%) |
| $\pi(2)$ O(85) – S(84) | 0.08787 | $sp^{3.41}$ | s(22.66%) p(77.22%) |
| $\pi(2)$ O(86) – S(84) | 0.08261 | $sp^{2.80}$ | s(25.88%) p(72.37%) |
| $\pi(2)$ O(86) – S(84) | 0.08261 | $sp^{3.19}$ | s(23.84%) p(76.03%) |
| $\pi(2)$ O(87) – S(84) | 0.08660 | $sp^{2.90}$ | s(25.16%) p(73.00%) |
| $\pi(2)$ O(87) – S(84) | 0.08660 | $sp^{3.39}$ | s(22.74%) p(77.14%) |
| $\pi(2)$ O(89) – S(88) | 0.08152 | $sp^{2.77}$ | s(26.06%) p(72.21%) |
| $\pi(2)$ O(89) – S(88) | 0.08152 | $sp^{3.17}$ | s(23.95%) p(75.92%) |
| $\pi(2)$ O(90) – S(88) | 0.08696 | $sp^{2.94}$ | s(24.94%) p(73.22%) |
| $\pi(2)$ O(90) – S(88) | 0.08696 | $sp^{3.41}$ | s(22.67%) p(77.20%) |
| $\pi(2)$ O(91) – S(88) | 0.08797 | $sp^{2.94}$ | s(24.90%) p(73.27%) |
| $\pi(2)$ O(91) – S(88) | 0.08797 | $sp^{3.42}$ | s(22.60%) p(77.27%) |

Table S2 lists the calculated occupancies of natural orbitals. Three classes of NBOs are included, the Lewis-type orbitals, the valence non-Lewis orbital's and the Rydberg NBOs, which originate from orbitals outside the atomic valence shell. The calculated natural hybrids on atoms are also given in Table 6. As seen from Table 9, the  $\sigma$ C(13) – N(14) bond is formed from  $sp^{3.43}$  and  $sp^{2.12}$  hybrids on carbon and nitrogen atoms (which is the mixture of s(22.56%) p(77.32%) and s(32.04%) p(67.94%)). This NBO corresponds to a  $\sigma$ (C-N) bond with approximate composition of  $0.6120 C(sp^{3.43}) + 0.7909 N(sp^{2.12})$ . The weights are obtained from the squares of the coefficients as  $(0.6120)^2 = 0.3745$ , corresponding to 37,45% localization on carbon C(13). In a similar way the 62.54% localization on nitrogen is obtained. Overall, this describes a polar  $\sigma$ (C-N) bond. The  $\sigma$ C(15) – N(14) bond is formed from  $sp^{1.84}$  and  $sp^{2.53}$  hybrids on carbon and nitrogen atoms (which is the mixture of s(35.21%) p(64.75%) and s(28.30%) p(71.61%)). The  $\sigma$ C(38) – N(14) bond is formed from  $sp^{2.14}$  and  $sp^{3.28}$  hybrids on carbon and nitrogen atoms

(which is the mixture of s(31.85%) p(68.13%) and s(23.32%) p(76.56%)). The  $\sigma_{\text{N}(25) - \text{C}(24)}$  bond is formed from  $\text{sp}^{2.42}$  and  $\text{sp}^{1.72}$  hybrids on nitrogen and carbon atoms (which is the mixture of s(29.20%) p(70.70%) and s(36.76%) p(63.19%)). The  $\sigma_{\text{N}(25) - \text{C}(26)}$  bond is formed from  $\text{sp}^{2.05}$  and  $\text{sp}^{2.85}$  hybrids on nitrogen and carbon atoms (which is the mixture of s(32.75%) p(67.22%) and s(25.98%) p(73.92%)). The  $\sigma_{\text{N}(25) - \text{C}(34)}$  bond is formed from  $\text{sp}^{2.28}$  and  $\text{sp}^{3.57}$  hybrids on nitrogen and carbon atoms (which is the mixture of s(30.45%) p(69.53%) and s(21.85%) p(78.02%)). The  $\sigma_{\text{C}(8) - \text{Cl}(83)}$  bond is formed from  $\text{sp}^{3.22}$  and  $\text{sp}^{4.20}$  hybrids on carbon and chloride atoms (which is the mixture of s(23.68%) p(76.15%) and s(19.15%) p(80.34%)). This NBO corresponds to a  $\sigma(\text{C}-\text{Cl})$  bond with approximate composition of  $0.6737 \text{C}(\text{sp}^{3.22}) + 0.7390 \text{Cl}(\text{sp}^{4.20})$ . The weights are obtained from the squares of the coefficients as  $(0.6737)^2 = 0.4538$ , corresponding to 45.38% localization on carbon C(8). In a similar way the 54.61% localization on Cl is obtained. Overall, this describes a polar  $\sigma(\text{C}-\text{Cl})$  bond. The  $\sigma_{\text{C}(41) - \text{S}(88)}$  bond is formed from  $\text{sp}^{4.23}$  and  $\text{sp}^{3.05}$  hybrids on carbon and sulfur atoms (which is the mixture of s(19.09%) p(80.80%) and s(24.32%) p(74.18%)). This NBO corresponds to a  $\sigma(\text{C}-\text{S})$  bond with approximate composition of  $0.7138 \text{C}(\text{sp}^{4.23}) + 0.7003 \text{S}(\text{sp}^{3.05})$ . The weights are obtained from the squares of the coefficients as  $(0.7138)^2 = 0.5095$ , corresponding to 50.95% localization on carbon C(41). In a similar way the 49.05% localization on S is obtained. Overall, this describes a polar  $\sigma(\text{C}-\text{S})$  bond. The  $\sigma_{\text{O}(85) - \text{S}(84)}$  bond is formed from  $\text{sp}^{2.94}$  and  $\text{sp}^{3.41}$  hybrids on sulfur and oxygen atoms (which is the mixture of s(24.94%) p(73.22%) and s(22.66%) p(77.22%)). This NBO corresponds to a  $\sigma(\text{O}-\text{S})$  bond with approximate composition of  $0.5876 \text{S}(\text{sp}^{2.94}) + 0.8092 \text{O}(\text{sp}^{3.41})$ . The weights are obtained from the squares of the coefficients as  $(0.5876)^2 = 0.3452$ , corresponding to 34.52% localization on sulfur S(84). In a similar way the 65.48% localization on O is obtained. Overall, this describes a polar  $\sigma(\text{O}-\text{S})$  bond. The  $\sigma_{\text{O}(86) - \text{S}(84)}$  bond is formed from  $\text{sp}^{2.80}$  and  $\text{sp}^{3.19}$  hybrids on oxygen and sulfur atoms (which is the mixture of s(25.88%) p(72.37%) and s(23.84%) p(76.03%)). The  $\sigma_{\text{O}(87) - \text{S}(84)}$  bond is formed from  $\text{sp}^{2.90}$  and  $\text{sp}^{3.39}$  hybrids on oxygen and sulfur atoms (which is the mixture of s(25.16%) p(73.00%) and s(22.74%) p(77.14%)). The  $\sigma_{\text{O}(89) - \text{S}(88)}$  bond is formed from  $\text{sp}^{2.77}$  and  $\text{sp}^{3.17}$  hybrids on oxygen and sulfur atoms (which is the mixture of s(26.06%) p(72.21%) and s(23.95%) p(75.92%)). The  $\sigma_{\text{O}(90) - \text{S}(88)}$  bond is formed from  $\text{sp}^{2.94}$  and  $\text{sp}^{3.41}$  hybrids on oxygen and sulfur atoms (which is the mixture of s(24.94%) p(73.22%) and s(22.67%) p(77.20%)). The  $\sigma_{\text{O}(91) - \text{S}(88)}$  bond is formed from  $\text{sp}^{2.94}$  and  $\text{sp}^{3.42}$  hybrids on

oxygen and sulfur atoms (which is the mixture of s(24.90%) p(73.27%) and s(22.60%) p(77.27%)). The  $\pi$  C(13) – N(14) bond is formed from  $sp^{3.43}$  and  $sp^{2.12}$  hybrids on carbon and nitrogen atoms (which is the mixture of s(22.56%) p(77.32%) and s(32.04%) p(67.94%)). The  $\pi$ C(15) – N(14) bond is formed from  $sp^{1.84}$  and  $sp^{2.53}$  hybrids on carbon and nitrogen atoms (which is the mixture of s(35.21%) p(64.75%) and s(28.30%) p(71.61%)). The  $\pi$ C(38) – N(14) bond is formed from  $sp^{2.14}$  and  $sp^{3.28}$  hybrids on carbon and nitrogen atoms (which is the mixture of s(31.85%) p(68.13%) and s(23.32%) p(76.56%)). The  $\pi$ N(25) – C(24) bond is formed from  $sp^{2.42}$  and  $sp^{1.72}$  hybrids on nitrogen and carbon atoms (which is the mixture of s(29.20%) p(70.70%) and s(36.76%) p(63.19%)). The  $\pi$ N(25) – C(26) bond is formed from  $sp^{2.05}$  and  $sp^{2.85}$  hybrids on nitrogen and carbon atoms (which is the mixture of s(32.75%) p(67.22%) and s(25.98%) p(73.92%)). The  $\pi$  N(25) – C(34) bond is formed from  $sp^{2.28}$  and  $sp^{3.57}$  hybrids on nitrogen and carbon atoms (which is the mixture of s(30.45%) p(69.53%) and s(21.85%) p(78.02%)). The  $\pi$ C(8) – Cl(83) bond is formed from  $sp^{3.22}$  and  $sp^{4.20}$  hybrids on carbon and chloride atoms (which is the mixture of s(23.68%) p(76.15%) and s(19.15%) p(80.34%)). The  $\pi$ C(41) – S(88) bond is formed from  $sp^{4.23}$  and  $sp^{3.05}$  hybrids on carbon and sulfur atoms (which is the mixture of s(19.09%) p(80.80%) and s(24.32%) p(74.18%)). The  $\pi$ O(85) – S(84) bond is formed from  $sp^{2.94}$  and  $sp^{3.41}$  hybrids on oxygen and sulfur atoms (which is the mixture of s(24.94%) p(73.22%) and s(22.66%) p(77.22%)). The  $\pi$ O(86) – S(84) bond is formed from  $sp^{2.80}$  and  $sp^{3.19}$  hybrids on oxygen and sulfur atoms (which is the mixture of s(25.88%) p(72.37%) and s(23.84%) p(76.03%)). The  $\pi$ O(87) – S(84) bond is formed from  $sp^{2.90}$  and  $sp^{3.39}$  hybrids on oxygen and sulfur atoms (which is the mixture of s(25.16%) p(73.00%) and s(22.74%) p(77.14%)). The  $\pi$ O(89) – S(88) bond is formed from  $sp^{2.77}$  and  $sp^{3.17}$  hybrids on oxygen and sulfur atoms (which is the mixture of s(26.06%) p(72.21%) and s(23.95%) p(75.92%)). The  $\pi$ O(90) – S(88) bond is formed from  $sp^{2.94}$  and  $sp^{3.41}$  hybrids on oxygen and sulfur atoms (which is the mixture of s(24.94%) p(73.22%) and s(22.67%) p(77.20%)). The  $\pi$ O(91) – S(88) bond is formed from  $sp^{2.94}$  and  $sp^{3.42}$  hybrids on oxygen and sulfur atoms (which is the mixture of s(24.90%) p(73.27%) and s(22.60%) p(77.27%)).
